# Supplementary material
Source: publisher figshare collection journal article supplement (https://acs.figshare.com/ndownloader/files/7621054)
Supplement: Supplementary file 1 [file 7621054]

## Supporting Information

### **A Fluorene-Based Two-Dimensional Covalent Organic Framework with Thermoelectric Properties through Doping**

Liangying Wang,<sup>†,‡</sup> Bin Dong,<sup>†,§,‡,\*</sup> Rile Ge,<sup>†</sup> Fengxing Jiang,<sup>#</sup> Jingkun Xu<sup>#,\*</sup>

<sup>†</sup>Dalian Institute of Chemical Physics, Chinese Academy of Sciences, Dalian 116023, China

<sup>#</sup>College of Pharmacy, Jiangxi Science and Technology Normal University, Nanchang 330013, China

<sup>§</sup>College of Chemical Engineering, China University of Mining and Technology, Xuzhou 221116, China

<sup>‡</sup>L. Wang and B. Dong contributed equally to this work.

<sup>\*</sup>Corresponding author: dongbin@dicp.ac.cn; xujingkun@tsinghua.org.cn

|                                                                                            |      |
|--------------------------------------------------------------------------------------------|------|
| Scheme S1 Schematic illustration of the thermopower measurement.                           | S-3  |
| Figure S1 FTIR spectra of FL-COF-1.                                                        | S-4  |
| Figure S2 TEM images of FL-COF-1.                                                          | S-5  |
| Figure S3 TGA data of FL-COF-1.                                                            | S-6  |
| Figure S4 BET surface area plot of FL-COF-1.                                               | S-7  |
| Figure S5 PXRD pattern of I <sub>2</sub> @FL-COF-1.                                        | S-8  |
| Figure S6 N <sub>2</sub> sorptions and BET surface area plot of I <sub>2</sub> @FL-COF-1.  | S-9  |
| Figure S7 FTIR and XRD data of the dedoped I <sub>2</sub> @FL-COF-1.                       | S-10 |
| Figure S8 Thermoelectric voltage as a function of $\Delta T$ for I <sub>2</sub> @FL-COF-1. | S-11 |
| Figure S9 Raman spectrum of I <sub>2</sub> @FL-COF-1.                                      | S-12 |

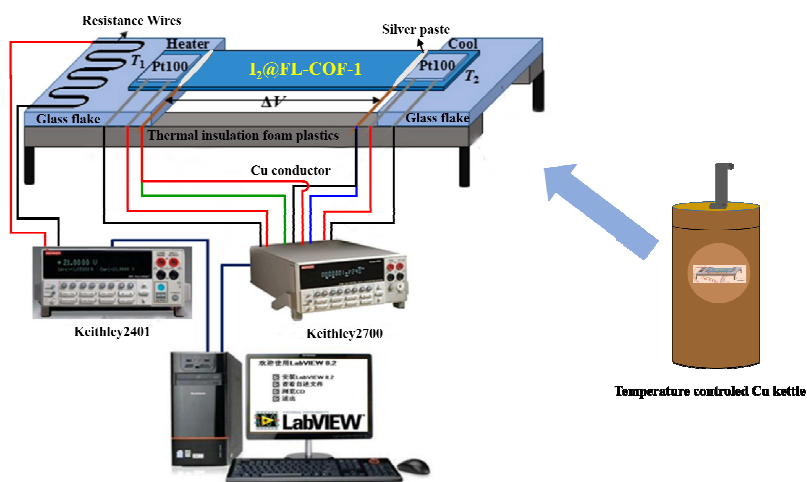

**Scheme S1.** Schematic illustration of the thermopower measurement.

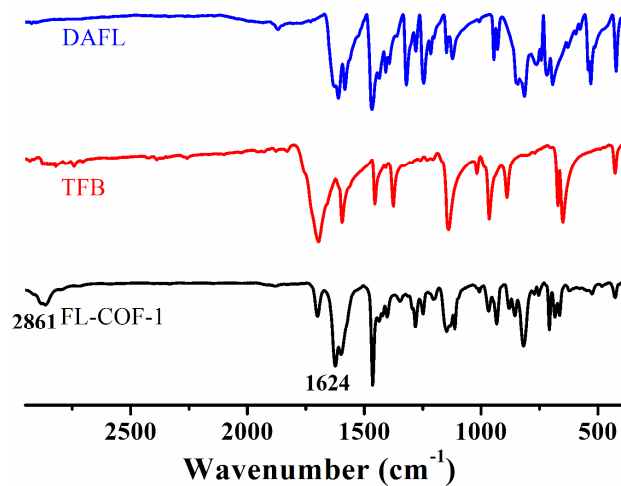

**Figure S1.** FTIR spectra of FL-COF-1 (black), TFB (red), and DAFL (blue). The appearance of an intensive band at 1624 cm<sup>-1</sup> in FL-COF-1 confirmed the formation of new imine bonds (C=N).

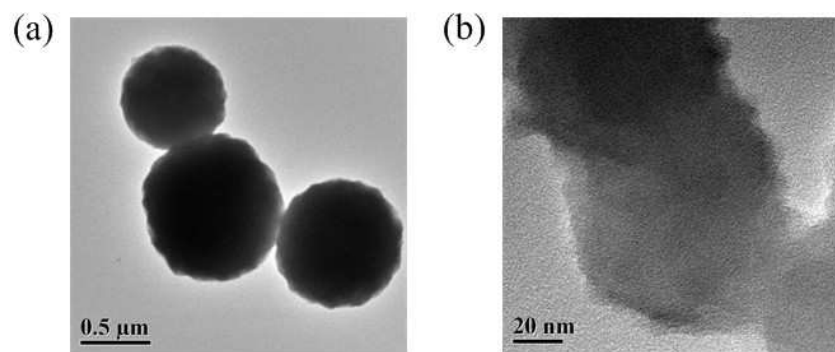

**Figure S2.** TEM images of FL-COF-1 at different magnifications.

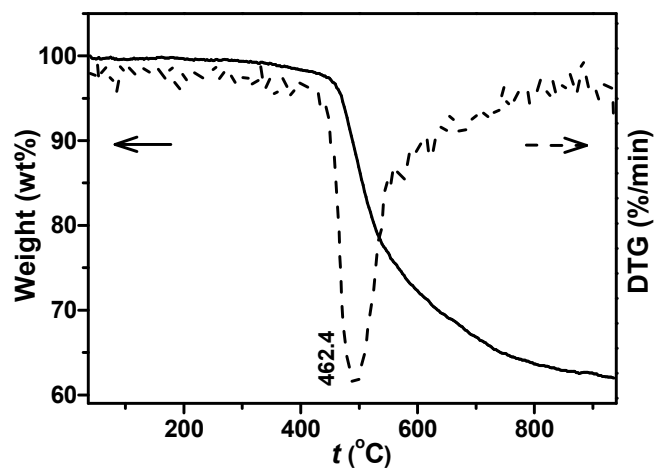

**Figure S3.** TGA and DTG plots of FL-COF-1 under a nitrogen atmosphere.

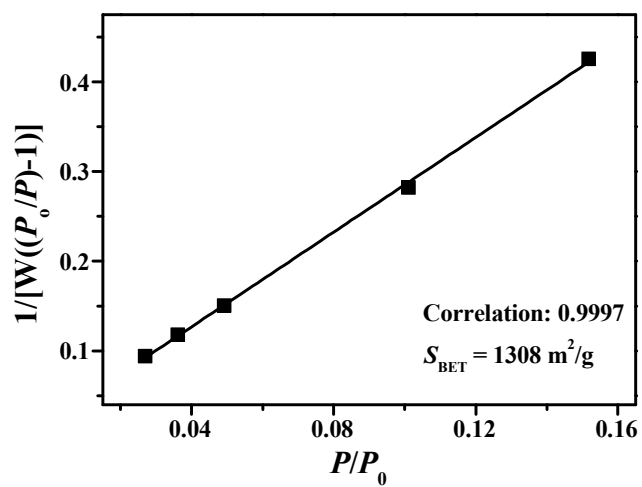

**Figure S4.** BET linear plot and surface area of FL-COF-1 calculated from the N<sub>2</sub> adsorption isotherm at 77 K.

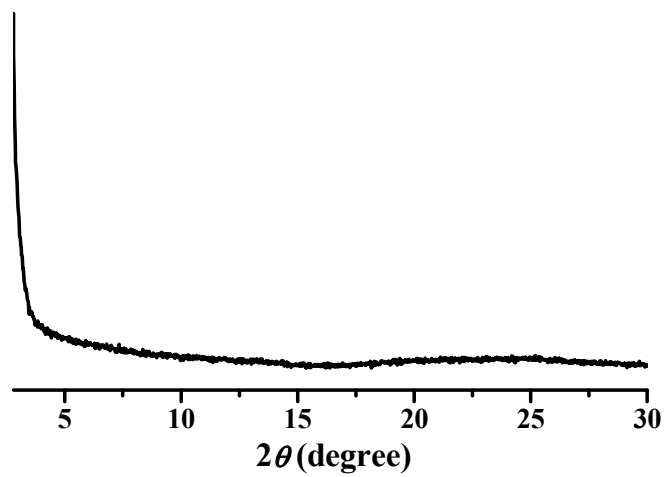

**Figure S5.** The PXRD pattern of I<sub>2</sub>@FL-COF-1.



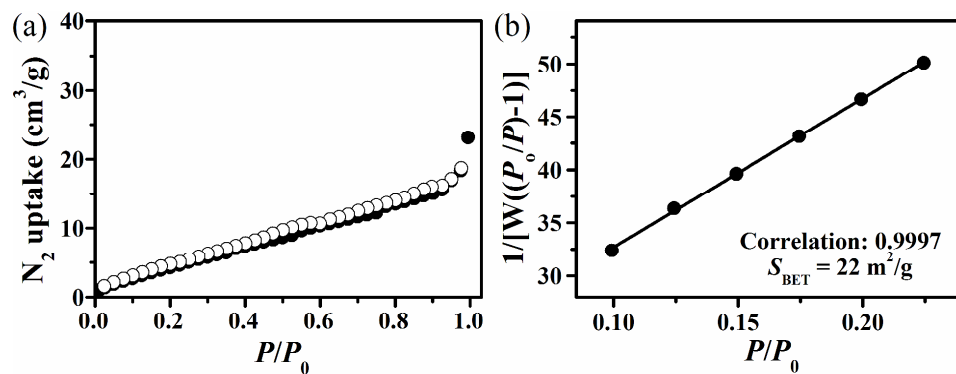

**Figure S6.** (a)  $N_2$  sorption isotherms measured at 77 K and (b) BET surface area plot of  $I_2@FL-COF-1$ .

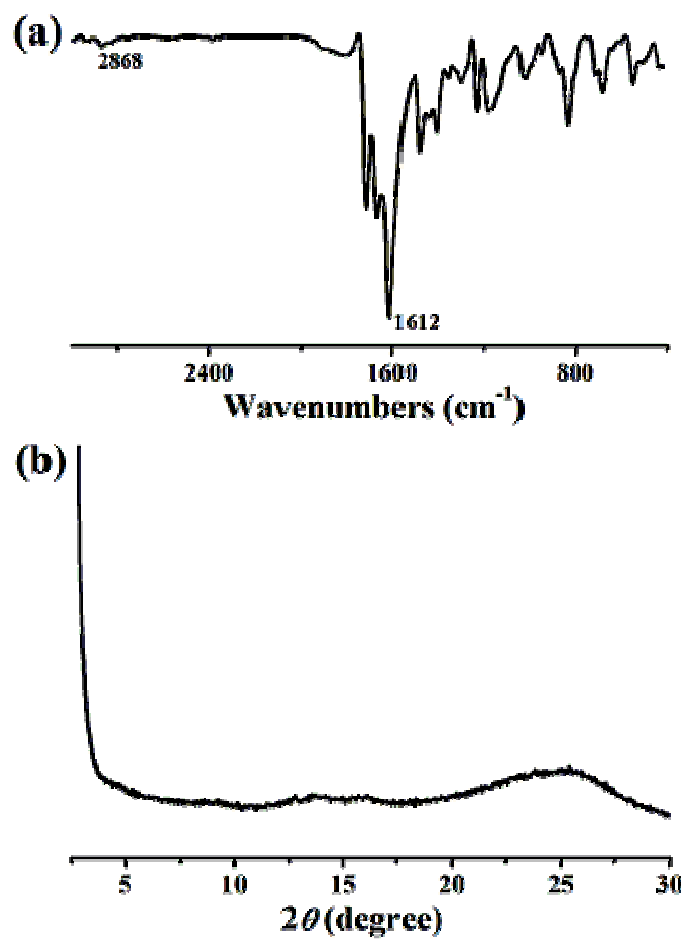

**Figure S7.** (a) FTIR and (b) XRD data of the dedoped I<sub>2</sub>@FL-COF-1.

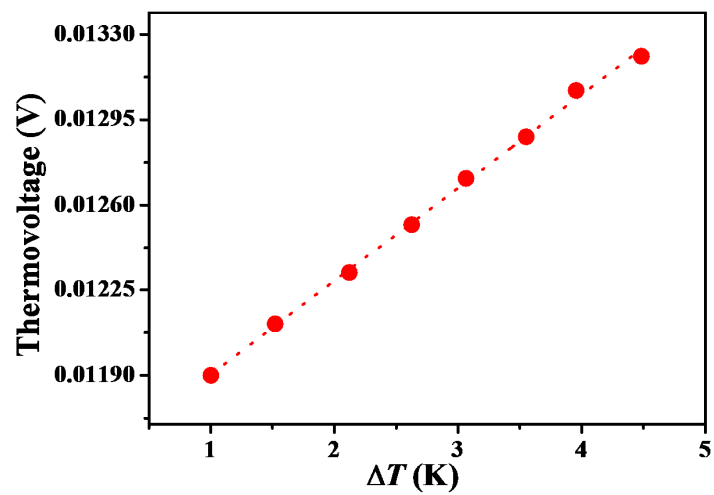

**Figure S8.** Thermoelectric voltage as a function of  $\Delta T$  for  $\text{I}_2@\text{FL-COF-1}$ .

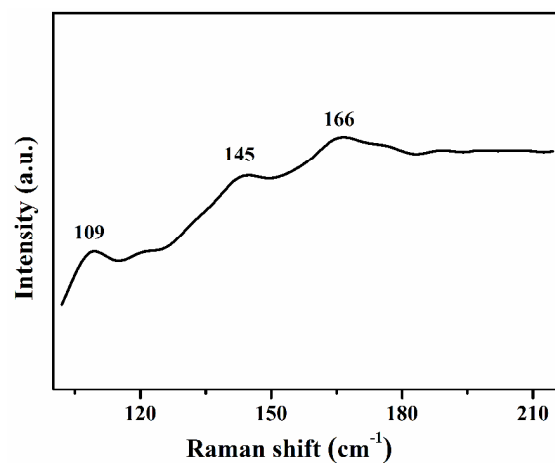

**Figure S9.** Raman spectrum of  $\text{I}_2@\text{FL-COF-1}$ . The characteristic peak around  $109\text{ cm}^{-1}$  corresponded to the perturbed iodine molecules, whereas the peaks at  $145$  and  $164\text{ cm}^{-1}$  reflected the existence of  $\text{I}^{5-}$  from  $\text{I}^-$  ions and di-iodine molecules  $[\text{I}^-(\text{I}_2)_2]$ .
